# Supplementary material for: Granulocyte colony-stimulating factor (G-CSF) promotes spermatogenic regeneration from surviving spermatogonia after high-dose alkylating chemotherapy
Source: Springer Nature journal article supplement (doi:10.1186/s12958-016-0226-1), 2017-01-11

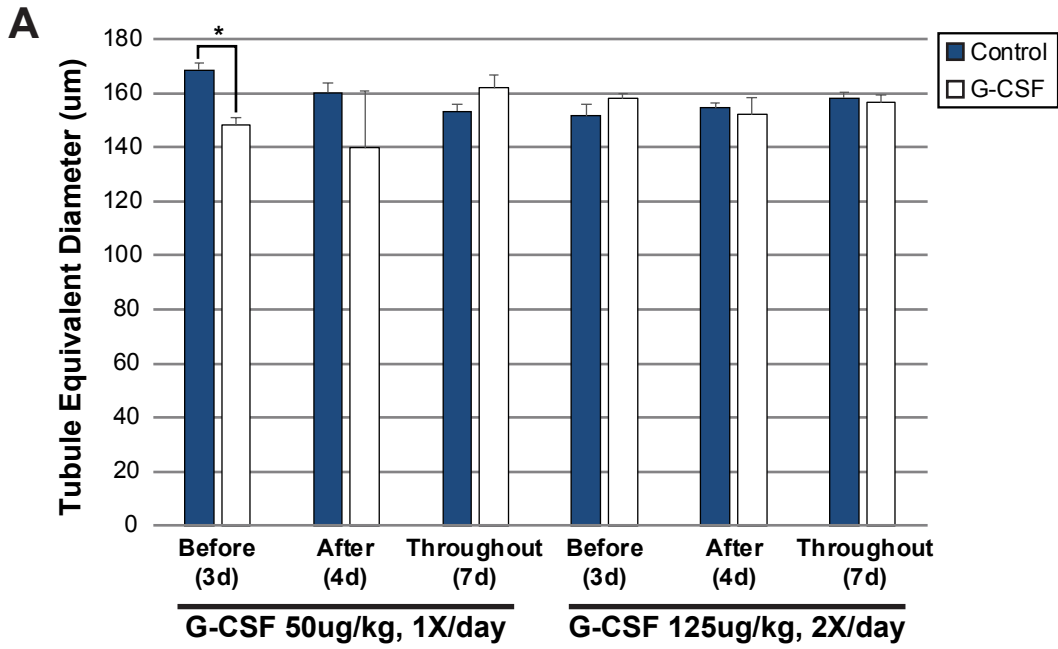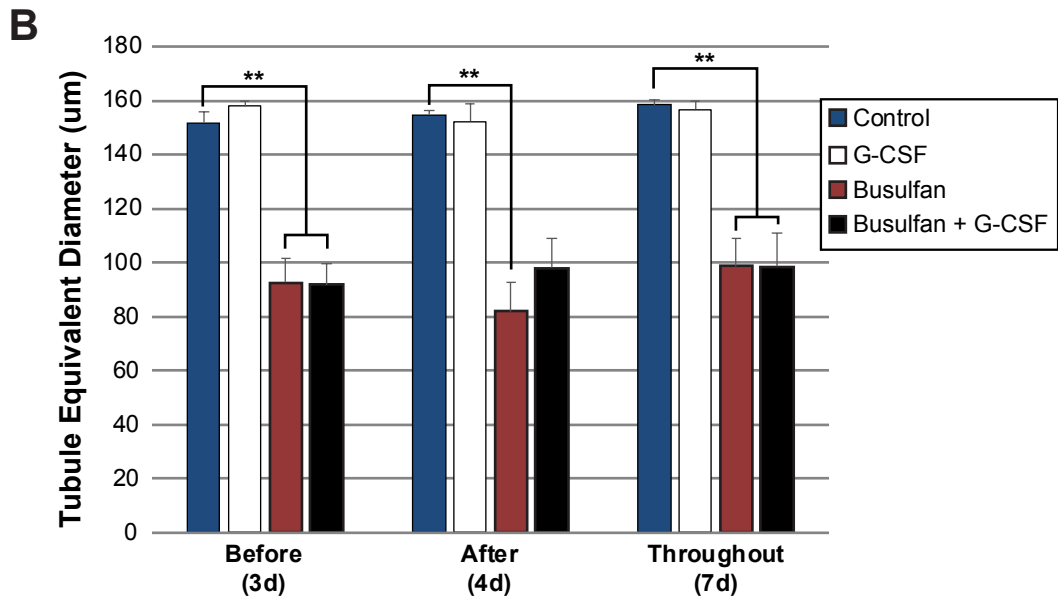

Supplement: MOESM2 [file 11992186]
